# Supplementary material
Source: PubMed Central journal article supplement (PMC2812665)
Supplement: NIHMS158653-supplement-01.pdf [file NIHMS158653-supplement-01.pdf]

## **Supplemental Material**

# **Hha and CspD toxins and Hfq are involved in persister formation through MqsR in *Escherichia coli***

Younghoon Kim<sup>1</sup>, and Thomas K. Wood\*

Department of Chemical Engineering, Texas A & M University, College Station, Texas 77843-3122

**Supplemental Table S1.** Bacterial strains, plasmids, and primers used in this study. f indicates forward primer and r indicates reverse primer.

| Strains, plasmids, primers         | Genotype/relevant characteristics or sequence                                                                         | Source |
|------------------------------------|-----------------------------------------------------------------------------------------------------------------------|--------|
| <b><i>E. coli</i> K-12 strains</b> |                                                                                                                       |        |
| BW25113                            | <i>lacI<sup>f</sup> rrnB<sub>T14</sub> ΔlacZ<sub>WJ16</sub> hsdR514 ΔaraBAD<sub>AH33</sub> ΔrhaBAD<sub>LD78</sub></i> | [23]   |
| BW25113 <i>mqsR</i>                | K-12 BW25113 Δ <i>mqsR</i> Ω Km <sup>R</sup>                                                                          | [23]   |
| BW25113 <i>mqsR mqsA</i>           | K-12 BW25113 Δ <i>mqsR</i> Δ <i>mqsA</i> Ω Km <sup>R</sup>                                                            | [10]   |
| BW25113 <i>hha</i>                 | K-12 BW25113 Δ <i>hha</i> Ω Km <sup>R</sup>                                                                           | [23]   |
| BW25113 <i>clpX</i>                | K-12 BW25113 Δ <i>clpX</i> Ω Km <sup>R</sup>                                                                          | [23]   |
| BW25113 <i>clpP</i>                | K-12 BW25113 Δ <i>clpP</i> Ω Km <sup>R</sup>                                                                          | [23]   |
| BW25113 <i>lon</i>                 | K-12 BW25113 Δ <i>lon</i> Ω Km <sup>R</sup>                                                                           | [23]   |
| BW25113 <i>yjz</i>                 | K-12 BW25113 Δ <i>yjz</i> Ω Km <sup>R</sup>                                                                           | [23]   |
| BW25113 <i>cspD</i>                | K-12 BW25113 Δ <i>cspD</i> Ω Km <sup>R</sup>                                                                          | [23]   |
| BW25113 <i>hokA</i>                | K-12 BW25113 Δ <i>hokA</i> Ω Km <sup>R</sup>                                                                          | [23]   |
| BW25113 <i>hfq</i>                 | K-12 BW25113 Δ <i>hfq</i> Ω Km <sup>R</sup>                                                                           | [23]   |
| <b>Plasmids</b>                    |                                                                                                                       |        |
| pCA24N                             | Cm <sup>R</sup> ; <i>lacI<sup>f</sup></i> , pCA24N                                                                    | [24]   |
| pCA24N- <i>mqsR</i>                | Cm <sup>R</sup> ; <i>lacI<sup>f</sup></i> , pCA24N P <sub>T5-lac</sub> :: <i>mqsR</i> <sup>+</sup>                    | [24]   |
| pCA24N- <i>hha</i>                 | Cm <sup>R</sup> ; <i>lacI<sup>f</sup></i> , pCA24N P <sub>T5-lac</sub> :: <i>hha</i> <sup>+</sup>                     | [24]   |
| pCA24N- <i>clpX</i>                | Cm <sup>R</sup> ; <i>lacI<sup>f</sup></i> , pCA24N P <sub>T5-lac</sub> :: <i>clpX</i> <sup>+</sup>                    | [24]   |
| pCA24N- <i>clpP</i>                | Cm <sup>R</sup> ; <i>lacI<sup>f</sup></i> , pCA24N P <sub>T5-lac</sub> :: <i>clpP</i> <sup>+</sup>                    | [24]   |
| pCA24N- <i>lon</i>                 | Cm <sup>R</sup> ; <i>lacI<sup>f</sup></i> , pCA24N P <sub>T5-lac</sub> :: <i>lon</i> <sup>+</sup>                     | [24]   |
| pCA24N- <i>yjz</i>                 | Cm <sup>R</sup> ; <i>lacI<sup>f</sup></i> , pCA24N P <sub>T5-lac</sub> :: <i>yjz</i> <sup>+</sup>                     | [24]   |
| pCA24N- <i>cspD</i>                | Cm <sup>R</sup> ; <i>lacI<sup>f</sup></i> , pCA24N P <sub>T5-lac</sub> :: <i>cspD</i> <sup>+</sup>                    | [24]   |
| pCA24N- <i>hokA</i>                | Cm <sup>R</sup> ; <i>lacI<sup>f</sup></i> , pCA24N P <sub>T5-lac</sub> :: <i>hokA</i> <sup>+</sup>                    | [24]   |
| pCA24N- <i>hfq</i>                 | Cm <sup>R</sup> ; <i>lacI<sup>f</sup></i> , pCA24N P <sub>T5-lac</sub> :: <i>hfq</i> <sup>+</sup>                     | [24]   |
| pBS(Kan)                           | Km <sup>R</sup> ; cloning vector                                                                                      | [26]   |
| pBS(Kan)- <i>mqsR</i>              | Km <sup>R</sup> ; pBS(Kan) P <sub>lac</sub> :: <i>mqsR</i> <sup>+</sup>                                               | [10]   |
| pBS(Kan)- <i>mqsA</i>              | Km <sup>R</sup> ; pBS(Kan) P <sub>lac</sub> :: <i>mqsA</i> <sup>+</sup>                                               | [10]   |
| pBS(Kan)- <i>mqsR-mqsA</i>         | Km <sup>R</sup> ; pBS(Kan) P <sub>lac</sub> :: <i>mqsR</i> <sup>+</sup> - <i>mqsA</i> <sup>+</sup>                    | [10]   |
| <b>Primers for qRT-PCR</b>         |                                                                                                                       |        |
| <i>mqsR</i>                        | f: 5'-CCTGTTAAATGCAGATGAGTTAGGT-3'<br>r: 5'-CTTAAACGAGACGATCAGTACGTCA-3'                                              |        |
| <i>hha</i>                         | f: 5'-GAATTCTTGCAGGTTGATACCTCTA-3'<br>r: 5'-GACCAATAAACTCAGGGATAAGACC-3'                                              |        |
| <i>cspD</i>                        | f: 5'-GAAAAGGGTACTGTTAAGTGGTTCA-3'<br>r: 5'-GGACATCAAACCTGAACGGATTGTCC-3'                                             |        |
| <i>hokA</i>                        | f: 5'-CACGCTTTTATTTTTCACCTGGATG-3'<br>r: 5'-CTTCAATTTGCAGGCTAAAAACGC-3'                                               |        |
| <i>hfq</i>                         | f: 5'-TTAAGCTGCAAGGGCAAATC-3'<br>r: 5'-GGTTTCTTCGCTGTCCTGTT-3'                                                        |        |

Km<sup>R</sup> and Cm<sup>R</sup> are kanamycin and chloramphenicol resistance, respectively.

**Supplemental Table S2.** Partial list of differentially expressed genes for planktonic cells of BW25113 *hfq* vs. BW25113 grown to a turbidity of 0.5 at 600 nm in LB medium at 37°C, adjusted to a turbidity of 1, and exposed to 100 µg/mL ampicillin for 2 h.

| Class             | Gene                  | b number    | Fold change | Description                                                           |
|-------------------|-----------------------|-------------|-------------|-----------------------------------------------------------------------|
| <b>Metabolism</b> | <i>entC</i>           | b0593       | -3.5        | isochorismate hydroxymutase 2, enterochelin biosynthesis              |
|                   | <i>fumC</i>           | b1611       | 4.0         | fumarase C, fumarate hydratase Class II, isozyme                      |
|                   | <i>narP</i>           | b2193       | 3.7         | nitratenuitrite response regulator (sensor NarQ)                      |
|                   | <i>lrhA</i>           | b2289       | 4.0         | NADH dehydrogenase transcriptional regulator, LysR family             |
|                   | <i>yghJ</i>           | b2974       | -19.7       | putative endoglucanase                                                |
|                   | <i>yghK</i>           | b2975       | -58.0       | putative permease                                                     |
|                   | <i>glcB</i>           | b2976       | -22.5       | malate synthase G                                                     |
|                   | <i>glcG</i>           | b2977       | -20.7       | hypothetical protein                                                  |
|                   | <i>glcF</i>           | b2978       | -23.2       | glycolate oxidase iron-sulfur subunit                                 |
|                   | <i>glcD</i>           | b2979       | -14.9       | glycolate oxidase subunit D                                           |
|                   | <i>glcC</i>           | b2980       | -28.9       | transcriptional activator for <i>glc</i> operon                       |
|                   | <i>yghO'</i>          | b2981       | -180.3      | hypothetical protein                                                  |
|                   | <i>tdcR</i>           | b3119       | -4.9        | threonine dehydratase operon activator protein                        |
|                   | <i>gadA</i>           | b3517       | -3.5        | glutamate decarboxylase isozyme                                       |
|                   | <i>aceB</i>           | b4014       | 4.3         | malate synthase A                                                     |
|                   | <i>aceA</i>           | b4015       | 3.5         | isocitrate lyase                                                      |
|                   | <b>Motility</b>       | <i>csgD</i> | b1040       | -3.5                                                                  |
| <i>csgB</i>       |                       | b1041       | -3.7        | minor curlin subunit precursor, similar to CsgA                       |
| <i>flgA</i>       |                       | b1072       | -4.0        | flagellar biosynthesis, assembly of basal-body periplasmic P ring     |
| <i>flgB</i>       |                       | b1073       | -4.9        | flagellar biosynthesis, cell-proximal portion of basal-body rod       |
| <i>cheW</i>       |                       | b1887       | -7.0        | positive regulator of CheA protein activity                           |
| <i>cheA</i>       |                       | b1888       | -5.3        | sensory transducer kinase for chemotaxis                              |
| <i>fliA</i>       |                       | b1922       | -4.6        | flagellar biosynthesis, alternative sigma factor 28                   |
| <i>fliC</i>       |                       | b1923       | -19.7       | flagellar biosynthesis, flagellin, filament structural protein        |
| <i>fliD</i>       |                       | b1924       | -8.0        | flagellar biosynthesis, filament capping protein                      |
| <b>Stress</b>     | <i>dnaK</i>           | b0014       | 2.5         | chaperone Hsp70, DNA biosynthesis                                     |
|                   | <i>dnaJ</i>           | b0015       | 2.3         | chaperone with DnaK; heat shock protein                               |
|                   | <i>clpP</i>           | b0437       | 2.5         | ATP-dependent proteolytic subunit of <i>clpA-clpP</i> serine protease |
|                   | <i>clpX</i>           | b0438       | 2.1         | ATP-dependent specificity component of <i>clpP</i> serine protease    |
|                   | <i>lon</i>            | b0439       | 2.1         | DNA-binding, ATP-dependent protease La, heat shock K-protein          |
|                   | <i>sfnC</i>           | b0531       | -3.7        | putative chaperone                                                    |
|                   | <i>cspH</i>           | b0989       | -4.0        | cold shock-like protein                                               |
|                   | <i>cspG</i>           | b0990       | -3.5        | homolog of Salmonella cold shock protein                              |
|                   | <i>ymgA</i>           | b1165       | -4.9        | hypothetical protein                                                  |
|                   | <i>cspF</i>           | b1558       | -3.5        | cold shock protein homolog                                            |
|                   | <i>emrY</i>           | b2367       | -3.5        | multidrug resistance protein Y                                        |
|                   | <i>yqiH</i>           | b3047       | -4.0        | putative periplasmic pilus chaperone                                  |
|                   | <i>yhcA</i>           | b3215       | -3.5        | putative chaperone                                                    |
|                   | <i>slp</i>            | b3506       | -5.7        | outer membrane protein induced after carbon starvation                |
|                   | <i>cspA</i>           | b3556       | -3.5        | cold shock protein 7.4, transcriptional activator of <i>hns</i>       |
| <b>Transport</b>  | <i>oppA</i>           | b1243       | 4.6         | oligopeptide transport, periplasmic binding protein                   |
|                   | <i>oppB</i>           | b1244       | 5.7         | oligopeptide transport permease protein                               |
|                   | <i>oppC</i>           | b1245       | 4.9         | homolog of Salmonella oligopeptide transport permease protein         |
|                   | <i>oppD</i>           | b1246       | 4.3         | homolog of Salmonella oligopeptide ABC transport system               |
|                   | <i>oppF</i>           | b1247       | 4.0         | homolog of Salmonella oligopeptide ABC transport system               |
|                   | <i>proV</i>           | b2677       | -4.0        | transport system for glycine, betaine and proline                     |
|                   | <i>proW</i>           | b2678       | -4.0        | high-affinity transport system for glycine betaine and proline        |
|                   | <i>dppA</i>           | b3544       | 3.7         | dipeptide transport protein                                           |
|                   | <b>Outer membrane</b> | <i>sbmA</i> | b0377       | 7.0                                                                   |
| <i>yaiW</i>       |                       | b0378       | 4.6         | required for swarming phenotype, probable lipoprotein                 |

|                  |                        |             |                      |                                                                    |                                   |
|------------------|------------------------|-------------|----------------------|--------------------------------------------------------------------|-----------------------------------|
| <b>Regulator</b> | <i>ybfM</i>            | b0681       | 19.7                 | putative outer membrane porin protein                              |                                   |
|                  | <i>ybfN</i>            | b0682       | 7.0                  | novel verified lipoprotein, function unknown                       |                                   |
|                  | <i>hha</i>             | b0460       | 2.0                  | haemolysin expression modulating protein                           |                                   |
|                  | <i>appY</i>            | b0564       | -3.7                 | regulatory protein affecting <i>appA</i> and other genes           |                                   |
|                  | <i>ybdO</i>            | b0603       | -4.0                 | putative transcriptional regulator LYSR-type                       |                                   |
|                  | <i>hns</i>             | b1237       | 2.5                  | DNA-binding protein, pleiotropic regulator                         |                                   |
|                  | <i>ygeK</i>            | b2855       | -4.3                 | putative 2-component transcriptional regulator                     |                                   |
|                  | <i>tdcA</i>            | b3118       | -3.5                 | transcriptional activator of <i>tdc</i> operons                    |                                   |
|                  | <i>fis</i>             | b3261       | 1.9                  | site-specific DNA inversion stimulation factor                     |                                   |
|                  | <i>cadC</i>            | b4133       | -3.5                 | transcriptional activator of <i>cad</i> operons                    |                                   |
|                  | <i>gadY</i>            | b4452       | -3.7                 | sRNA regulator of <i>gadAB</i> transcriptional activator GadX mRNA |                                   |
|                  | <i>micC</i>            | b4427       | -3.7                 | MicC sRNA regulator of OmpC translation                            |                                   |
|                  | <b>Uncharacterized</b> | <i>dksA</i> | b0145                | 2.0                                                                | transcriptional regulator of rRNA |
|                  |                        | <i>ybcN</i> | b0547                | -4.3                                                               | hypothetical protein              |
|                  |                        | <i>ybcV</i> | b0558                | -3.5                                                               | putative an envelop protein       |
| <i>ybiJ</i>      |                        | b0802       | 3.7                  | hypothetical protein                                               |                                   |
| <i>ycfS</i>      |                        | b1113       | 5.7                  | hypothetical protein                                               |                                   |
| <i>yncJ</i>      |                        | b1436       | 4.0                  | hypothetical protein, predicted secreted protein                   |                                   |
| <i>yebE</i>      |                        | b1846       | 4.0                  | hypothetical protein                                               |                                   |
| <i>ypeC</i>      |                        | b2390       | 3.7                  | hypothetical protein                                               |                                   |
| <i>yqaD</i>      |                        | b2654       | -4.6                 | hypothetical protein                                               |                                   |
| <i>yqaC</i>      |                        | b2655       | -4.0                 | hypothetical protein                                               |                                   |
| <i>yqeH</i>      |                        | b2846       | -3.5                 | hypothetical protein                                               |                                   |
| <i>yqeK</i>      |                        | b2849       | -4.6                 | hypothetical protein                                               |                                   |
| <i>ygeF</i>      |                        | b2850       | -3.5                 | hypothetical protein                                               |                                   |
| <i>ygeG</i>      |                        | b2851       | -3.5                 | hypothetical protein                                               |                                   |
| <i>ygeH</i>      |                        | b2852       | -4.9                 | putative invasion protein                                          |                                   |
| <i>ygeI</i>      |                        | b2853       | -3.7                 | hypothetical protein                                               |                                   |
| <i>ygeJ</i>      |                        | b2854       | -4.6                 | hypothetical protein, putative murein hydrolase                    |                                   |
| <i>yhcN</i>      |                        | b3238       | 3.7                  | hypothetical protein, periplasmic protein                          |                                   |
| <i>yhiK</i>      |                        | b3489       | -4.3                 | hypothetical protein                                               |                                   |
| <i>yhiL</i>      |                        | b3490       | -3.7                 | hypothetical protein                                               |                                   |
| <i>yhiM</i>      | b3491                  | -4.6        | hypothetical protein |                                                                    |                                   |
| <i>yhjW</i>      | b3546                  | 3.7         | hypothetical protein |                                                                    |                                   |

---

### SUPPLEMENTAL FIGURE LEGENDS

**Fig. S1.** Effect of isogenic mutations on persister cell production. BW25113 *clpX*/pCA24N-*clpX*, BW25113 *clpP*/pCA24N-*clpP*, BW25113 *lon*/pCA24N-*lon*, and BW25113 *yjz*/pCA24N-*yjz* were grown to a turbidity of 0.5 in LB medium at 37°C, contacted with 1 mM IPTG for 2 hr for induction, adjusted to a turbidity of 1, and exposed to 100 µg/mL ampicillin for 2 h in LB. Persister data are the average of two independent cultures, and one standard deviation is shown. The asterisk indicates statistical significance determined using a Student's *t*-test ( $p < 0.05$ ).

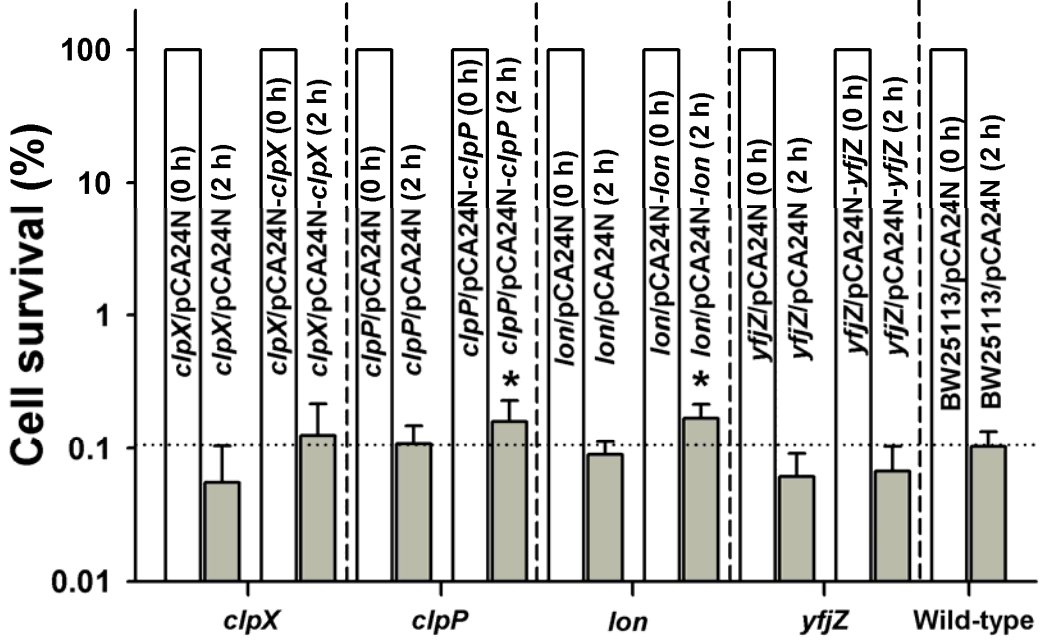

Figure S1
